# Supplementary material for: Size-controlled synthesis and magnetic properties of copper germanate nanorods. Observation of size-induced quenching of the spin-Peierls transition
Source: Royal Society of Chemistry journal article supplement (doi:10.1039/c3ce41862f), 2013-11-06
Supplement: c3ce41862f.pdf [file c3ce41862f.pdf]

## Supplementary Information

### **Size-controlled Synthesis and Magnetic Properties of Copper Germanate Nanorods. Observation of Size-induced Quenching of the Spin-Peierls Transition**

Zhao-Qian Li<sup>1</sup>, Lei Zhang<sup>1</sup>, You Song<sup>1</sup>, Xue-Tai Chen<sup>1\*</sup>, Janice L. Musfeldt<sup>2\*</sup>, & Zi-Ling Xue<sup>2\*</sup>

<sup>1</sup> *State Key Laboratory of Coordination Chemistry, Nanjing National Laboratory of Microstructures, School of Chemistry and Chemical Engineering, Nanjing University, Nanjing 210093, P. R. China*

<sup>2</sup> *Department of Chemistry, The University of Tennessee, Knoxville, Tennessee 37996-1600, USA*

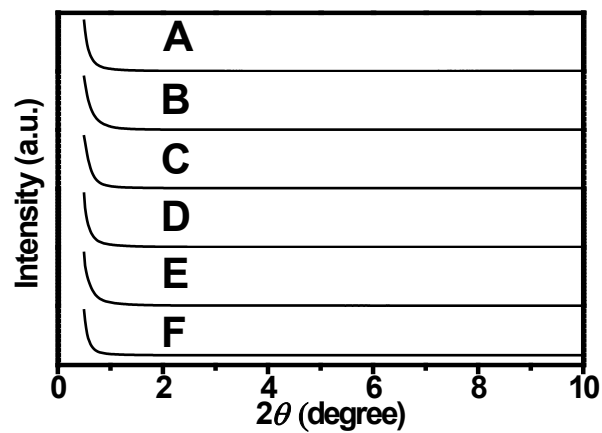

**Fig. S1** Low-angle XRD patterns of the obtained  $\text{CuGeO}_3$  materials: nanorods **A**, **B**, **C**, **D**, **E** and bulk **F**. No peaks were observed in low-angle XRD patterns.

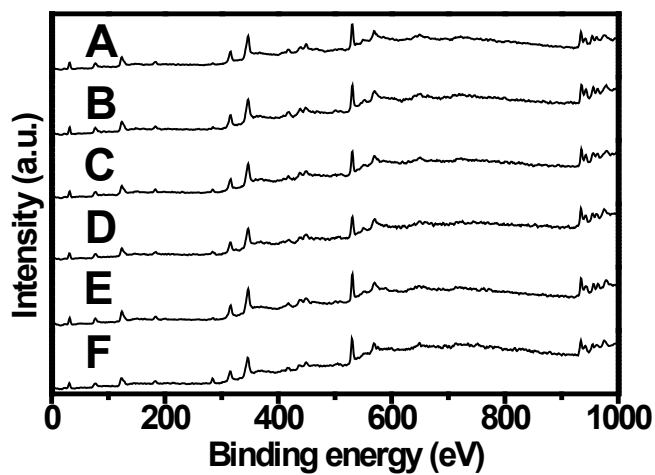

**Fig. S2** XPS spectra of **A**, **B**, **C**, **D**, **E** and **F**.

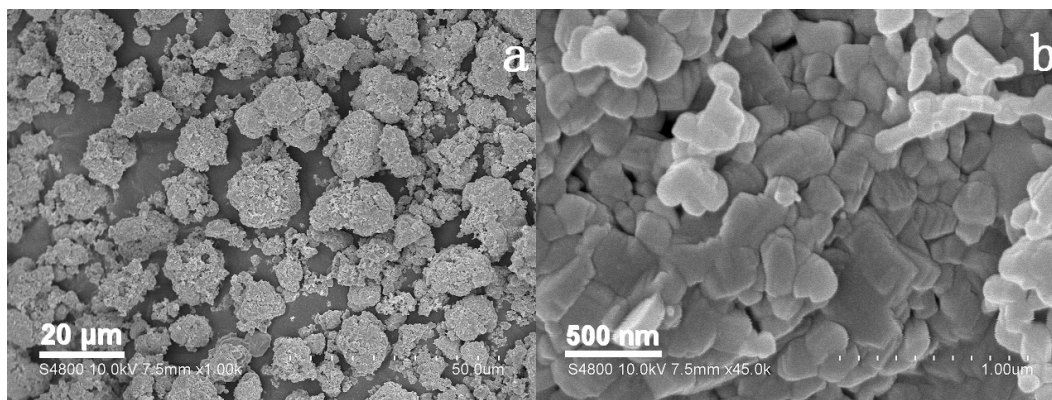

Fig. S3 SEM image of bulk  $\text{CuGeO}_3$  F.

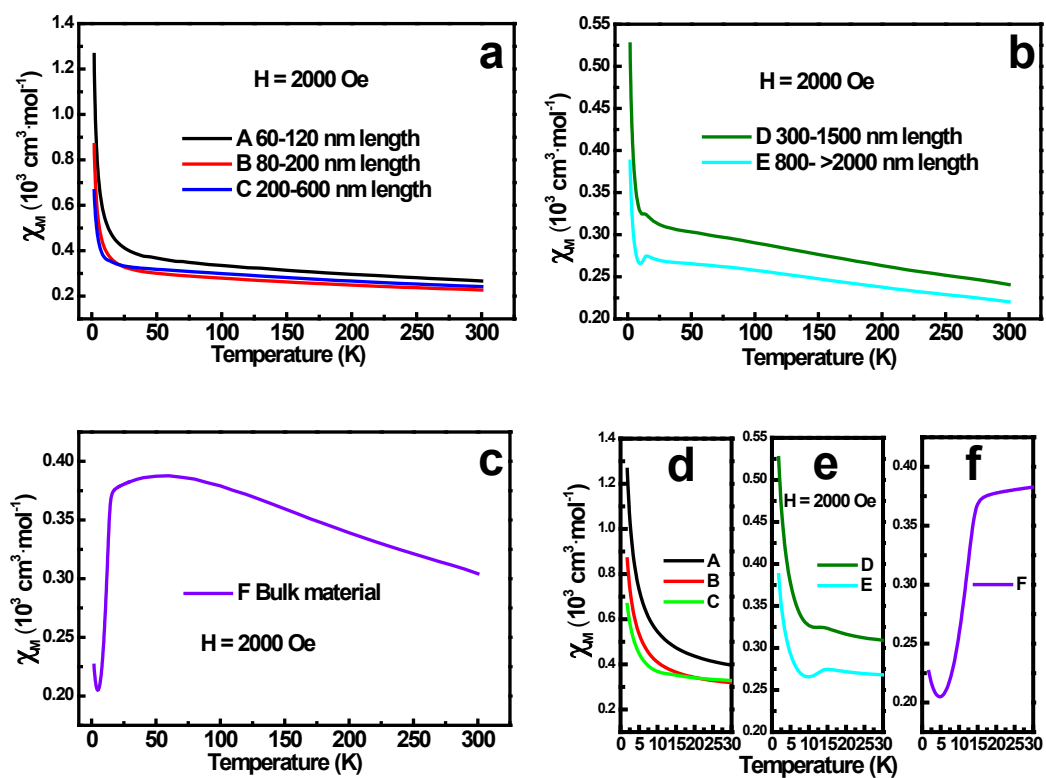

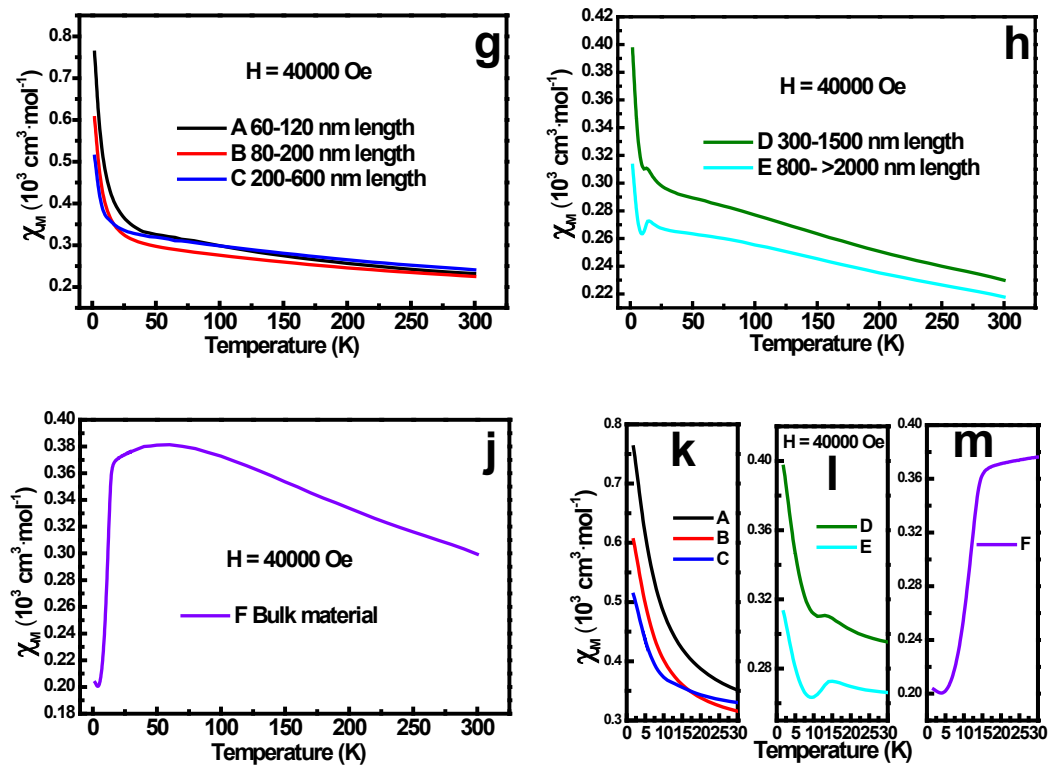

**Fig. S4** Plots of the magnetic susceptibility of CuGeO<sub>3</sub> samples A, B, C, D, E and F, measured under  $H = 2000 \text{ Oe}$  (a–f) or  $40000 \text{ Oe}$  (g–m) with a temperature range of 1.8–300 K or 1.8–30 K.
